# Supplementary material
Source: Springer Nature journal article supplement (https://www.springermedizin.de/resource/supplementary/12880_2013_212_MOESM2_ESM.pdf/9450320)

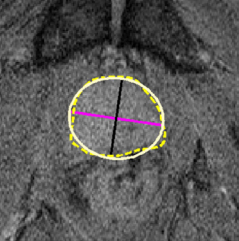

(a) slice 6

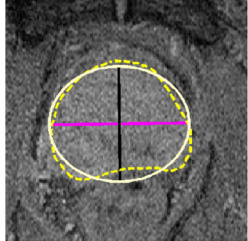

(b) slice 9

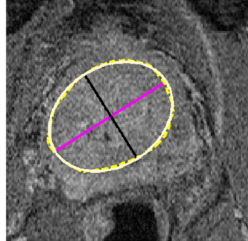

(c) slice 12

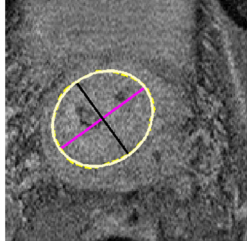

(d) slice 15

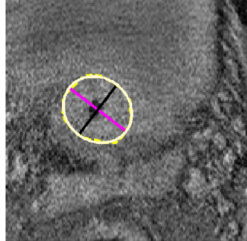

(e) slice 17

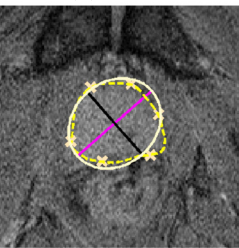

(f) slice 6

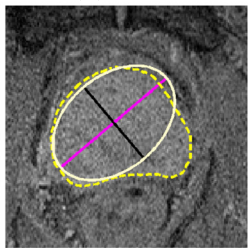

(g) slice 9

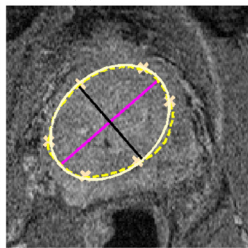

(h) slice 12

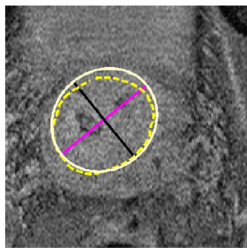

(i) slice 15

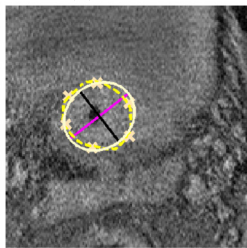

(j) slice 17

Supplement: MOESM2 [file 9450320]
